# Supplementary material for: Acculturation and diet quality of young Filipino children in the United States Affiliated Pacific Islands
Source: Research Square preprint supplement (doi:10.21203/rs.3.rs-8961066/v1), 2026-03-24
Supplement: Supplementary file 1 [file d165dfb8aea5d482fa048de1.docx]

| Table S1. Top 5 foods most frequently consumed among Filipino children reporting dietary intake in the Children's Healthy Living Program at time 1 in Guam, the Northern Mariana Islands, and Hawai´i | | | | | | | | | | | | |
| --- | --- | --- | --- | --- | --- | --- | --- | --- | --- | --- | --- | --- |
|  | **Overall (n=446)** | | | **Commonwealth of the Northern Mariana Islands (n=194)** | | | **Guam (n=111)** | | | **Hawaiʻi (n=141)** | | |
| Food | n | % of children reporting | Food | n | % of children reporting | Food | n | % of children reporting | Food | n | % of children reporting |
| **Grains** | White rice | 420 | 94.2 | White rice | 193 | 99.5 | White rice | 105 | 94.6 | White rice | 122 | 86.5 |
| White bread | 271 | 60.8 | White bread | 113 | 58.2 | White bread | 74 | 66.7 | White bread | 84 | 59.6 |
| Other cereal1 | 223 | 50.0 | Other cereal1 | 88 | 45.4 | Other cereal1 | 55 | 49.5 | Other cereal1 | 80 | 56.7 |
| Crackers | 129 | 28.9 | Crackers | 41 | 21.1 | Other bread2 | 27 | 24.3 | Crackers | 65 | 46.1 |
| Other bread2 | 90 | 20.2 | Other bread2 | 31 | 16.0 | Crackers | 23 | 20.7 | Pancake, waffles, french toast | 33 | 23.4 |
| **Vegetables** | Other vegetables3 | 124 | 27.8 | Other vegetables3 | 59 | 30.4 | Potatoes | 37 | 33.3 | Other vegetables3 | 48 | 34.0 |
| Potatoes | 106 | 23.8 | Carrots | 39 | 20.1 | Light green lettuce | 24 | 21.6 | Light green lettuce | 41 | 29.1 |
| Tomatoes | 95 | 21.3 | Onion | 38 | 19.6 | Tomatoes | 22 | 19.8 | Tomatoes | 41 | 29.1 |
| Carrots | 82 | 18.4 | Potatoes | 38 | 19.6 | Other vegetables3 | 17 | 15.3 | Potatoes | 31 | 22.0 |
| Light green lettuce | 78 | 17.5 | Tomatoes | 32 | 16.5 | Carrots | 14 | 12.6 | Carrots | 29 | 20.6 |
| **Fruits** | Other fruits4 | 151 | 33.9 | Other fruit juice5 | 68 | 35.1 | Other fruits4 | 33 | 29.7 | Apples | 59 | 41.8 |
| Apples | 143 | 32.1 | Banana | 66 | 34.0 | Banana | 29 | 26.1 | Other fruits4 | 54 | 38.3 |
| Other fruit juice5 | 143 | 32.1 | Other fruits4 | 64 | 33.0 | Other fruit juice5 | 28 | 25.2 | Other fruit juice5 | 47 | 33.3 |
| Banana | 139 | 31.2 | Apples | 57 | 29.4 | Apples | 27 | 24.3 | Banana | 44 | 31.2 |
| Oranges | 104 | 23.3 | Orange juice | 47 | 24.2 | Oranges | 22 | 19.8 | Oranges | 40 | 28.4 |
| **Milk/Dairy** | 2% milk | 265 | 59.4 | 2% milk | 117 | 60.3 | 2% milk | 70 | 63.1 | 2% milk | 78 | 55.3 |
| Low fat milk | 165 | 37.0 | Low fat milk | 76 | 39.2 | Low fat milk | 29 | 26.1 | Low fat milk | 60 | 42.6 |
| Processed cheese | 101 | 22.6 | Processed cheese | 45 | 23.2 | Processed cheese | 23 | 20.7 | Yogurt | 36 | 25.5 |
| Ice cream | 74 | 16.6 | Ice cream | 24 | 12.4 | Ice cream | 21 | 18.9 | Processed cheese | 33 | 23.4 |
| Whole milk | 55 | 12.3 | Whole milk | 19 | 9.8 | Whole milk | 16 | 14.4 | Ice cream | 29 | 20.6 |
| **Meats/Animal Products** | Chicken | 262 | 58.7 | Eggs | 113 | 58.2 | Chicken | 79 | 71.2 | Sausage | 78 | 55.3 |
| Sausage | 216 | 48.4 | Chicken | 111 | 57.2 | Sausage | 52 | 46.8 | Chicken | 72 | 51.1 |
| Eggs | 197 | 44.2 | Sausage | 86 | 44.3 | Eggs | 45 | 40.5 | Beef | 51 | 36.2 |
| Fresh fish | 129 | 28.9 | Fresh fish | 83 | 42.8 | Fresh fish | 30 | 27.0 | Eggs | 39 | 27.7 |
| Pork | 124 | 27.8 | Pork | 73 | 37.6 | Pork | 28 | 25.2 | Luncheon meats | 27 | 19.1 |
| 1Other cereal includes corn flakes, Rice Krispies, Cheerios, Honey Bunches of Oats, Froot Loops  2Other bread includes cinnamon rolls, doughnuts, pop tarts  3Other vegetables includes cucumber, mixed vegetables, eggplant  4Other fruits fruit salad, grapes, fruit cocktail  5Other fruit juice includes apple juice, grape juice, coconut water, pineapple juice | | | | | | | | | | | | |

| Table S2. Top three food sources of energy, macronutrients (carbohydrates, protein, fat), dietary fiber, added sugar, and saturated fat and their percent contribution to daily intake of Filipino children by Pacific jurisdiction. | | | | | | | |
| --- | --- | --- | --- | --- | --- | --- | --- |
| **Macronutrient** | **Rank** | **Commonwealth of the Northern Mariana Islands** | **%** | **Guam** | **%** | **Hawaiʻi** | **%** |
| **Energy** | 1 | Rice, white, not enriched, short grain, cooked, no salt | 15.0 | Rice, white, not enriched, short grain, cooked, no salt | 6.5 | Rice, white, not enriched, short grain, cooked, no salt | 7.6 |
| 2 | Rice, white, enriched, short grain, cooked, no salt | 4.0 | Rice, white, enriched, short grain, cooked, no salt | 6.1 | Milk, reduced fat (2%), fluid or reconstituted dry | 3.9 |
| 3 | Milk, reduced fat (2%), fluid or reconstituted dry | 3.8 | Milk, reduced fat (2%), fluid or reconstituted dry | 4.2 | Milk, low fat (1%), fluid or reconstituted dry | 2.7 |
| **Protein** | 1 | Rice, white, not enriched, short grain, cooked, no salt | 6.6 | Milk, reduced fat (2%), fluid or reconstituted dry | 7.3 | Milk, reduced fat (2%), fluid or reconstituted dry | 6.8 |
| 2 | Milk, reduced fat (2%), fluid or reconstituted dry | 6.0 | Milk, low fat (1%), fluid or reconstituted dry | 3.2 | Milk, low fat (1%), fluid or reconstituted dry | 5.7 |
| 3 | Milk, low fat (1%), fluid or reconstituted dry | 4.3 | Rice, white, not enriched, short grain, cooked, no salt | 3.2 | Rice, white, not enriched, short grain, cooked, no salt | 3.7 |
| **Carbohydrate** | 1 | Rice, white, not enriched, short grain, cooked, no salt | 26.0 | Rice, white, not enriched, short grain, cooked, no salt | 11.0 | Rice, white, not enriched, short grain, cooked, no salt | 12.6 |
| 2 | Rice, white, enriched, short grain, cooked, no salt | 6.9 | Rice, white, enriched, short grain, cooked, no salt | 10.4 | Milk, reduced fat (2%), fluid or reconstituted dry | 2.7 |
| 3 | Bread, white, enriched | 3.7 | Bread, white, enriched | 3.8 | Milk, low fat (1%), fluid or reconstituted dry | 2.4 |
| **Dietary Fiber** | 1 | Rice, white, not enriched, short grain, cooked, no salt | 6.3 | Bread, white, enriched | 4.6 | Apples, raw, w/ skin | 4.3 |
| 2 | Bananas, ripe | 6.2 | Bananas, ripe | 4.3 | Bread, whole wheat | 3.7 |
| 3 | Oranges, raw, all varieties | 4.2 | Rice, white, not enriched, short grain, cooked, no salt | 2.9 | Oranges, raw, all varieties | 3.3 |
| **Added Sugar** | 1 | Tea, sweetened, canned, no vitamin C added | 10.5 | Tea, sweetened, canned, no vitamin C added | 10.9 | Tea, sweetened, canned, no vitamin C added | 7.6 |
| 2 | Orange-apricot drink, canned1 | 6.3 | Orange-apricot drink, canned1 | 7.2 | Yogurt, low fat, w/ fruit | 5.8 |
| 3 | Milk, chocolate, w/ 2% reduced fat milk | 4.1 | Fruit punch drink, canned | 4.0 | Fruit punch drink, without added nutrients, canned | 5.4 |
| **Total Fat** | 1 | Sausage, frankfurter, beef & pork (unspecified) | 5.4 | Sausage, frankfurter, beef & pork (unspecified) | 4.9 | Milk, reduced fat (2%), fluid or reconstituted dry | 4.2 |
| 2 | Spam | 4.8 | Milk, reduced fat (2%), fluid or reconstituted dry | 4.4 | Sausage, frankfurter, beef & pork (unspecified) | 4.1 |
| 3 | Chicken, broiler or fryer, w/ skin, batter fried | 4.2 | Chicken, broiler or fryer, w/ skin, batter fried | 3.3 | Macaroni & cheese | 3.1 |
| **Saturated Fat** | 1 | Milk, reduced fat (2%), fluid or reconstituted dry | 7.7 | Milk, reduced fat (2%), fluid or reconstituted dry | 8.2 | Milk, reduced fat (2%), fluid or reconstituted dry | 7.3 |
| 2 | Sausage, frankfurter, beef & pork (unspecified) | 6.2 | Sausage, frankfurter, beef & pork (unspecified) | 5.6 | Sausage, frankfurter, beef & pork (unspecified) | 4.4 |
| 3 | Spam | 5.2 | Milk, whole, fluid | 3.0 | Macaroni & cheese | 3.9 |
| 1Used for unspecified juice-type drink | | | | | | | |

| Table S3. Top 3 food sources of vitamins, minerals and compounds and their percent contribution to daily intake of Filipino children by Pacific jurisdiction. | | | | | | | |
| --- | --- | --- | --- | --- | --- | --- | --- |
| **Vitamin** | **Rank** | **Commonwealth of the Northern Mariana Islands** | **%** | **Guam** | **%** | **Hawai'i** | **%** |
| **Choline** | 1 | Egg, scrambled | 8.6 | Milk, reduced fat (2%), fluid or reconstituted dry | 9.2 | Milk, reduced fat (2%), fluid or reconstituted dry | 8.4 |
| 2 | Milk, reduced fat (2%), fluid or reconstituted dry | 7.0 | Egg, scrambled | 4.4 | Milk, low fat (1%), fluid or reconstituted dry | 7.7 |
| 3 | Egg, fried | 6.0 | Milk, low fat (1%), fluid or reconstituted dry | 4.4 | Egg, scrambled | 6.0 |
| **Folate** | 1 | Rice, white, enriched, short grain, cooked, no salt | 12.8 | Rice, white, enriched, short grain, cooked, no salt | 16.9 | Cereal, Cheerios | 6.4 |
| 2 | Bread, white, enriched | 6.7 | Bread, white, enriched | 6.2 | Cereal, Life, Plain or cinnamon | 5.9 |
| 3 | Cereal, Cheerios | 5.9 | Cereal, Cheerios | 5.2 | Bread, white, enriched | 3.2 |
| **Niacin** | 1 | Rice, white, enriched, short grain, cooked, no salt | 5.1 | Rice, white, enriched, short grain, cooked, no salt | 7.9 | Mcdonald's, Chicken Mcnuggets | 2.4 |
| 2 | Rice, white, not enriched, short grain, cooked, no salt | 4.2 | Bread, white, enriched | 3.9 | Rice, white, not enriched, short grain, cooked, no salt | 2.4 |
| 3 | Bread, white, enriched | 3.7 | Chicken, broiler or fryer, w/ skin, batter fried | 2.9 | Bread, white, enriched | 2.1 |
| **Pantothenic Acid** | 1 | Rice, white, not enriched, short grain, cooked, no salt | 16.5 | Milk, reduced fat (2%), fluid or reconstituted dry | 11.5 | Milk, reduced fat (2%), fluid or reconstituted dry | 10.9 |
| 2 | Milk, reduced fat (2%), fluid or reconstituted dry | 9.3 | Rice, white, not enriched, short grain, cooked, no salt | 7.9 | Rice, white, not enriched, short grain, cooked, no salt | 9.5 |
| 3 | Milk, low fat (1%), fluid or reconstituted dry | 6.6 | Rice, white, enriched, short grain, cooked, no salt | 7.4 | Milk, low fat (1%), fluid or reconstituted dry | 9.1 |
| **Riboflavin** | 1 | Milk, reduced fat (2%), fluid or reconstituted dry | 13.5 | Milk, reduced fat (2%), fluid or reconstituted dry | 15.4 | Milk, reduced fat (2%), fluid or reconstituted dry | 12.6 |
| 2 | Milk, low fat (1%), fluid or reconstituted dry | 9.4 | Milk, low fat (1%), fluid or reconstituted dry | 6.5 | Milk, low fat (1%), fluid or reconstituted dry | 10.4 |
| 3 | Egg, scrambled | 3.4 | Milk, chocolate, w/ 2% reduced fat milk | 3.8 | Milk, whole, fluid | 3.3 |
| **Thiamin** | 1 | Rice, white, enriched, short grain, cooked, no salt | 6.6 | Rice, white, enriched, short grain, cooked, no salt | 10.0 | Milk, reduced fat (2%), fluid or reconstituted dry | 3.8 |
| 2 | Bread, white, enriched | 5.4 | Bread, white, enriched | 5.7 | Macaroni & cheese | 2.7 |
| 3 | Milk, reduced fat (2%), fluid or reconstituted dry | 3.8 | Milk, reduced fat (2%), fluid or reconstituted dry | 4.2 | Bread, white, enriched | 2.7 |
| **Vitamin A** | 1 | Milk, reduced fat (2%), fluid or reconstituted dry | 13.9 | Milk, reduced fat (2%), fluid or reconstituted dry | 17.2 | Milk, reduced fat (2%), fluid or reconstituted dry | 14.0 |
| 2 | Milk, low fat (1%), fluid or reconstituted dry | 10.2 | Milk, low fat (1%), fluid or reconstituted dry | 7.7 | Milk, low fat (1%), fluid or reconstituted dry | 12.1 |
| 3 | Egg, scrambled | 3.9 | Milk, chocolate, w/ 2% reduced fat milk | 5.0 | Carrots, fresh, cooked, drained | 4.8 |
| **Vitamin B6** | 1 | Rice, white, not enriched, short grain, cooked, no salt | 6.0 | Milk, reduced fat (2%), fluid or reconstituted dry | 3.8 | Milk, reduced fat (2%), fluid or reconstituted dry | 3.5 |
| 2 | Bananas, ripe | 5.0 | Bananas, ripe | 3.6 | Rice, white, not enriched, short grain, cooked, no salt | 3.5 |
| 3 | Cereal, Rice Krispies | 3.6 | Rice, white, not enriched, short grain, cooked, no salt | 3.0 | Bananas, ripe | 3.4 |
| **Vitamin B12** | 1 | Milk, reduced fat (2%), fluid or reconstituted dry | 11.3 | Milk, reduced fat (2%), fluid or reconstituted dry | 14.3 | Milk, reduced fat (2%), fluid or reconstituted dry | 13.0 |
| 2 | Milk, low fat (1%), fluid or reconstituted dry | 7.6 | Milk, low fat (1%), fluid or reconstituted dry | 5.8 | Milk, low fat (1%), fluid or reconstituted dry | 10.2 |
| 3 | Spaghetti, w/ white clam sauce | 5.4 | Milk, whole, fluid | 3.4 | Milk, whole, fluid | 3.3 |
| **Vitamin C** | 1 | Oranges, raw, all varieties | 12.8 | Orange juice, frozen, unsweetened, diluted | 10.6 | Oranges, raw, all varieties | 11.0 |
| 2 | Orange juice, frozen, unsweetened, diluted | 10.5 | Orange-apricot drink, canned1 | 10.2 | Fruit punch drink, canned | 6.8 |
| 3 | Orange-apricot drink, canned1 | 6.7 | Fruit punch drink, canned | 9.4 | Orange-apricot drink, canned1 | 6.6 |
| **Vitamin D** | 1 | Milk, reduced fat (2%), fluid or reconstituted dry | 29.3 | Milk, reduced fat (2%), fluid or reconstituted dry | 30.7 | Milk, reduced fat (2%), fluid or reconstituted dry | 26.3 |
| 2 | Milk, low fat (1%), fluid or reconstituted dry | 24.8 | Milk, low fat (1%), fluid or reconstituted dry | 15.7 | Milk, low fat (1%), fluid or reconstituted dry | 26.1 |
| 3 | Milk, chocolate, w/ 2% reduced fat milk | 5.7 | Milk, chocolate, w/ 2% reduced fat milk | 7.2 | Milk, whole, fluid | 6.4 |
| **Calcium** | 1 | Milk, reduced fat (2%), fluid or reconstituted dry | 23.7 | Milk, reduced fat (2%), fluid or reconstituted dry | 24.8 | Milk, reduced fat (2%), fluid or reconstituted dry | 18.6 |
| 2 | Milk, low fat (1%), fluid or reconstituted dry | 16.9 | Milk, low fat (1%), fluid or reconstituted dry | 10.7 | Milk, low fat (1%), fluid or reconstituted dry | 15.5 |
| 3 | Milk, chocolate, w/ 2% reduced fat milk | 4.6 | Milk, whole, fluid | 5.9 | Milk, whole, fluid | 4.7 |
| **Copper** | 1 | Rice, white, not enriched, short grain, cooked, no salt | 8.1 | Gatorade | 5.4 | Water | 4.8 |
| 2 | Water | 5.3 | Bread, white, enriched | 4.6 | Gatorade | 4.5 |
| 3 | Bread, white, enriched | 4.3 | Rice, white, not enriched, short grain, cooked, no salt | 3.5 | Rice, white, not enriched, short grain, cooked, no salt | 4.1 |
| **Iron** | 1 | Cereal, Honey Bunches of Oats | 6.7 | Rice, white, enriched, short grain, cooked, no salt | 10.2 | Cereal, Cheerios | 4.4 |
| 2 | Rice, white, enriched, short grain, cooked, no salt | 6.4 | Bread, white, enriched | 5.3 | Cereal, Life, Plain or cinnamon | 4.2 |
| 3 | Cereal, Rice Krispies | 5.6 | Cereal, Cheerios | 3.9 | Cereal, Rice Krispies | 3.2 |
| **Magnesium** | 1 | Rice, white, not enriched, short grain, cooked, no salt | 11.8 | Milk, reduced fat (2%), fluid or reconstituted dry | 8.0 | Milk, reduced fat (2%), fluid or reconstituted dry | 7.0 |
| 2 | Milk, reduced fat (2%), fluid or reconstituted dry | 6.5 | Rice, white, not enriched, short grain, cooked, no salt | 5.7 | Rice, white, not enriched, short grain, cooked, no salt | 6.2 |
| 3 | Milk, low fat (1%), fluid or reconstituted dry | 4.6 | Rice, white, enriched, short grain, cooked, no salt | 5.3 | Milk, low fat (1%), fluid or reconstituted dry | 5.8 |
| **Manganese** | 1 | Rice, white, not enriched, short grain, cooked, no salt | 29.2 | Rice, white, not enriched, short grain, cooked, no salt | 13.5 | Rice, white, not enriched, short grain, cooked, no salt | 15.3 |
| 2 | Rice, white, enriched, short grain, cooked, no salt | 7.8 | Rice, white, enriched, short grain, cooked, no salt | 12.7 | Rice, brown, cooked, no salt | 5.5 |
| 3 | Tea, sweetened, canned, no vitamin C added | 3.1 | Tea, sweetened, canned, no vitamin C added | 5.2 | Bread, whole wheat | 5.0 |
| **Phosphorus** | 1 | Milk, reduced fat (2%), fluid or reconstituted dry | 11.9 | Milk, reduced fat (2%), fluid or reconstituted dry | 14.0 | Milk, reduced fat (2%), fluid or reconstituted dry | 11.7 |
| 2 | Milk, low fat (1%), fluid or reconstituted dry | 8.4 | Milk, low fat (1%), fluid or reconstituted dry | 6.0 | Milk, low fat (1%), fluid or reconstituted dry | 9.7 |
| 3 | Rice, white, not enriched, short grain, cooked, no salt | 7.2 | Milk, chocolate, w/ 2% reduced fat milk | 3.8 | Rice, white, not enriched, short grain, cooked, no salt | 3.5 |
| **Potassium** | 1 | Milk, reduced fat (2%), fluid or reconstituted dry | 9.6 | Milk, reduced fat (2%), fluid or reconstituted dry | 11.8 | Milk, reduced fat (2%), fluid or reconstituted dry | 10.2 |
| 2 | Milk, low fat (1%), fluid or reconstituted dry | 6.7 | Milk, low fat (1%), fluid or reconstituted dry | 5.0 | Milk, low fat (1%), fluid or reconstituted dry | 8.3 |
| 3 | Bananas, ripe | 4.0 | Milk, chocolate, w/ 2% reduced fat milk | 3.3 | Milk, whole, fluid | 2.5 |
| **Selenium** | 1 | Rice, white, not enriched, short grain, cooked, no salt | 14.0 | Rice, white, not enriched, short grain, cooked, no salt | 6.7 | Rice, white, not enriched, short grain, cooked, no salt | 8.3 |
| 2 | Rice, white, enriched, short grain, cooked, no salt | 3.7 | Rice, white, enriched, short grain, cooked, no salt | 6.3 | Milk, low fat (1%), fluid or reconstituted dry | 4.0 |
| 3 | Egg, scrambled | 3.4 | Milk, reduced fat (2%), fluid or reconstituted dry | 3.7 | Milk, reduced fat (2%), fluid or reconstituted dry | 3.7 |
| **Sodium** | 1 | Spam | 6.2 | Sausage, frankfurter, beef & pork (unspecified) | 5.3 | Sausage, frankfurter, beef & pork (unspecified) | 4.1 |
| 2 | Sausage, frankfurter, beef & pork (unspecified) | 5.6 | Bread, white, enriched | 4.7 | Spam | 3.6 |
| 3 | Bread, white, enriched | 4.4 | Red rice | 4.6 | Kalua Pig | 2.7 |
| **Zinc** | 1 | Rice, white, not enriched, short grain, cooked, no salt | 8.9 | Milk, reduced fat (2%), fluid or reconstituted dry | 6.7 | Milk, reduced fat (2%), fluid or reconstituted dry | 5.9 |
| 2 | Milk, reduced fat (2%), fluid or reconstituted dry | 6.0 | Rice, white, not enriched, short grain, cooked, no salt | 3.9 | Milk, low fat (1%), fluid or reconstituted dry | 4.7 |
| 3 | Milk, low fat (1%), fluid or reconstituted dry | 4.1 | Rice, white, enriched, short grain, cooked, no salt | 3.7 | Rice, white, not enriched, short grain, cooked, no salt | 4.3 |
| **Nitrites** | 1 | Rice, white, not enriched, short grain, cooked, no salt | 37.6 | Rice, white, not enriched, short grain, cooked, no salt | 17.9 | Rice, white, not enriched, short grain, cooked, no salt | 25.0 |
| 2 | Rice, white, enriched, short grain, cooked, no salt | 10.0 | Rice, white, enriched, short grain, cooked, no salt | 16.8 | Sausage, frankfurter, beef & pork (unspecified) | 6.1 |
| 3 | Sausage, frankfurter, beef & pork (unspecified) | 6.0 | Corned beef, brisket, canned | 10.3 | Sausage, vienna, beef & pork | 4.8 |
| **Nitrates** | 1 | Rice, white, not enriched, short grain, cooked, no salt | 8.1 | Lettuce, head or iceberg | 11.7 | Lettuce, head or iceberg | 14.8 |
| 2 | Fruit salad | 5.3 | Melon, watermelon | 7.8 | Lettuce, Manoa | 6.1 |
| 3 | Beef broccoli | 4.3 | Chow mein, w/ pork & vegetable, home prepared | 3.5 | Melon, watermelon | 3.7 |
| 1Used for unspecified juice-type drink | | | | | | | |
